# Supplementary material for: Distinguishing Mast Cell Progenitors from Mature Mast Cells in Mice
Source: PubMed Central journal article supplement — Stem Cells Dev. 2015 Mar 6;24(14):1703–11. doi: 10.1089/scd.2014.0553 (PMC4499794; doi:10.1089/scd.2014.0553), 2015-03-06
Supplement: Supp_Figure1.pdf [file Supp_Figure1.pdf]

## Supplementary Data

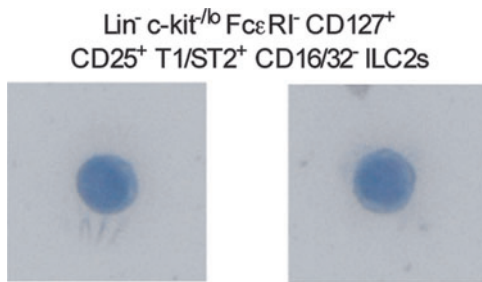

**SUPPLEMENTARY FIG. S1.** Lin<sup>-</sup> c-kit<sup>lo</sup> FcεRI<sup>-</sup> CD127<sup>+</sup> CD25<sup>+</sup> T1/ST2<sup>+</sup> CD16/32<sup>-</sup> ILC2s were sorted and stained with May-Grünwald Giemsa. Original magnification, 40×. The width of each photo corresponds to 32 μm. Representative photos from one out of two experiments are shown. ILC2s, innate lymphoid cells of type 2.
